# Supplementary material for: Hepatoprotective effects of Cassiae Semen on mice with non-alcoholic fatty liver disease based on gut microbiota
Source: PubMed Central journal article supplement (PMC8642482; doi:10.1038/s42003-021-02883-8), 2021-12-03
Supplement: 42003_2021_2883_MOESM2_ESM.pdf [file 42003_2021_2883_MOESM2_ESM.pdf]

Supplementary Fig. 1 CSE (10 g/kg), TA (10 g/kg), RG (20 mg/kg) or AO (20 mg/kg) altered microbiota diversities in NAFLD mice.

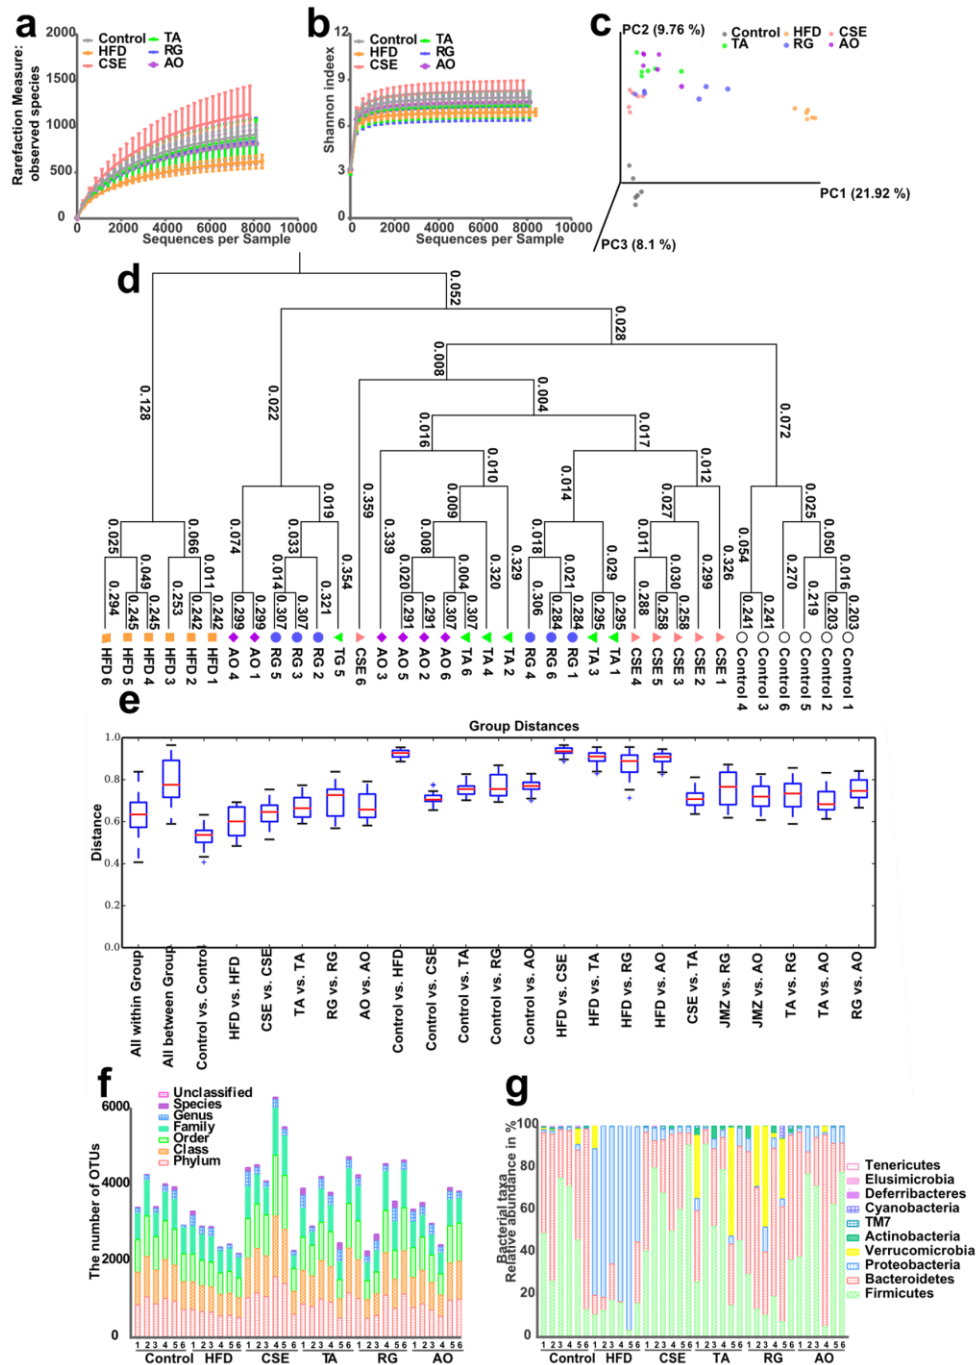

Alpha diversity analysis, for example, Rarefaction analysis (**a**) and Shannon index (**b**) of fecal samples from Control, HFD, CSE, TA, RG, and AO group mice (n=6 for each group), shown the diversity of each sample community. UniFrac-based principal coordinates analysis (PCoA) (**c**), Multivariate analysis of variance of PCoA matrix scores (**d**), and the differences of UniFrac distance between / within groups analysis (**e**), indicated the similarity of community structure among different samples. OTU classification and taxonomic identification results (**f**), taxonomic composition and abundance distribution of communities at phylum level in study groups (**g**), n = 6 mice/group.

Supplementary Fig. 2 Gut microbiota changes by FMT.

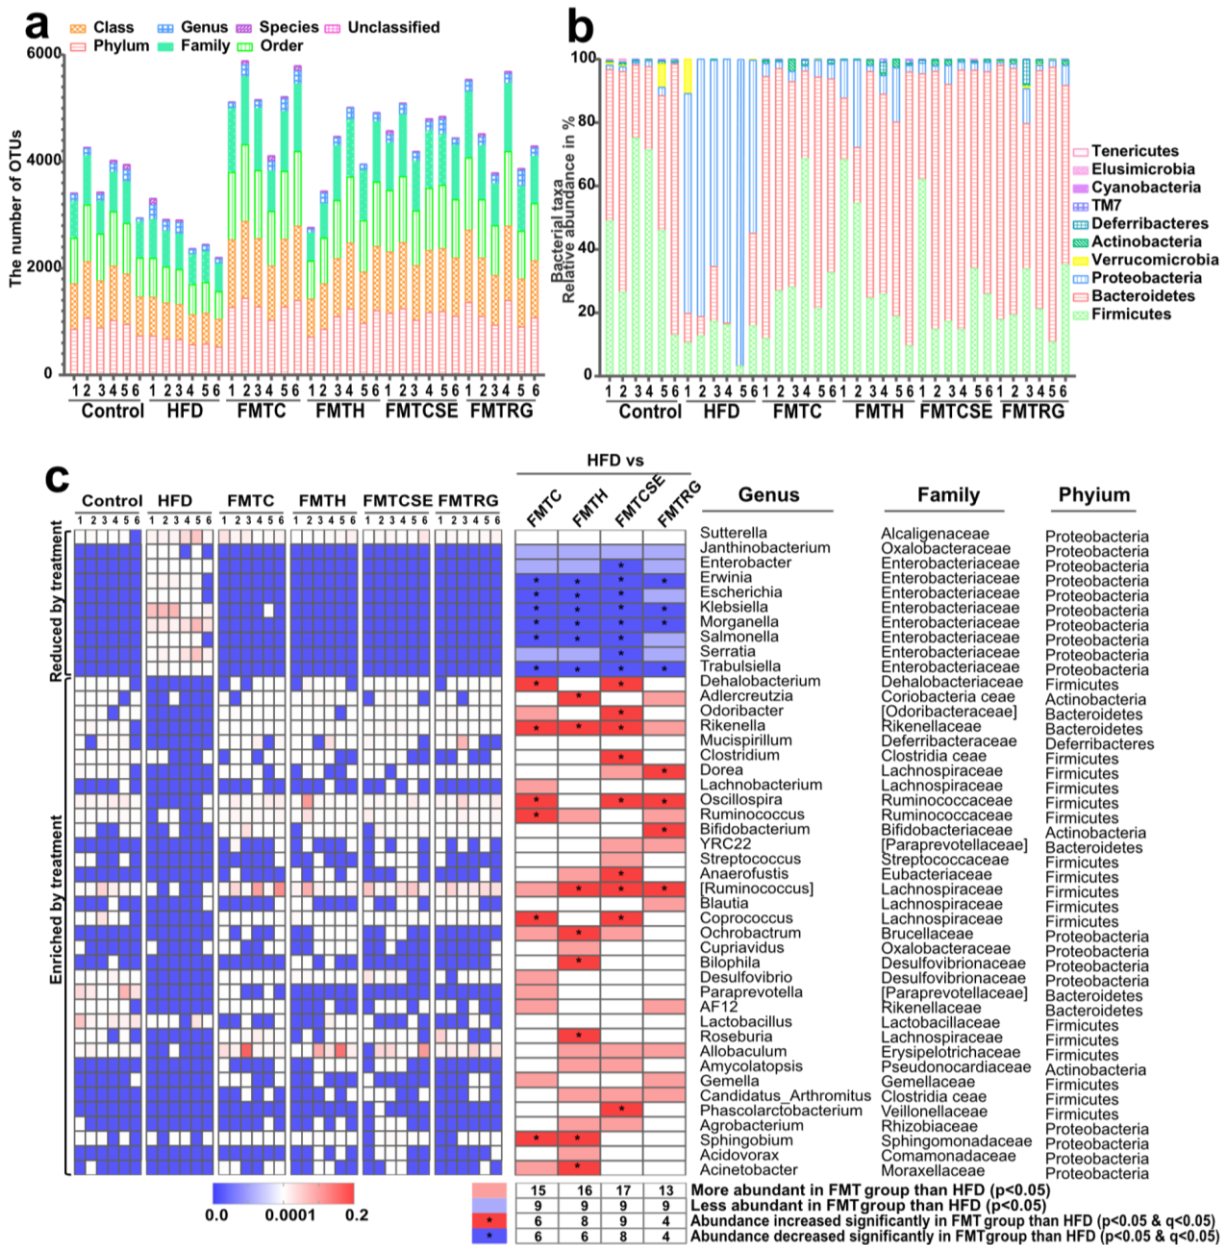

OTU classification and taxonomic identification results (a), taxonomic composition and abundance distribution of communities at phylum level in study groups (b), n = 6 mice/group. Genera changes by FMT (c). Heatmaps on the left show that relative abundance of bacterial genera was altered. Statistical analysis of differences between groups was performed by Metastats; in the image, red represents increased relative abundance, blue represents decreased, and \* represents a significant change in genus (both  $P < 0.05$  and  $Q < 0.05$ ). The corresponding genus information is on the right.

Supplementary Fig. 3 Gut microbiota changes by antibiotic treatments.

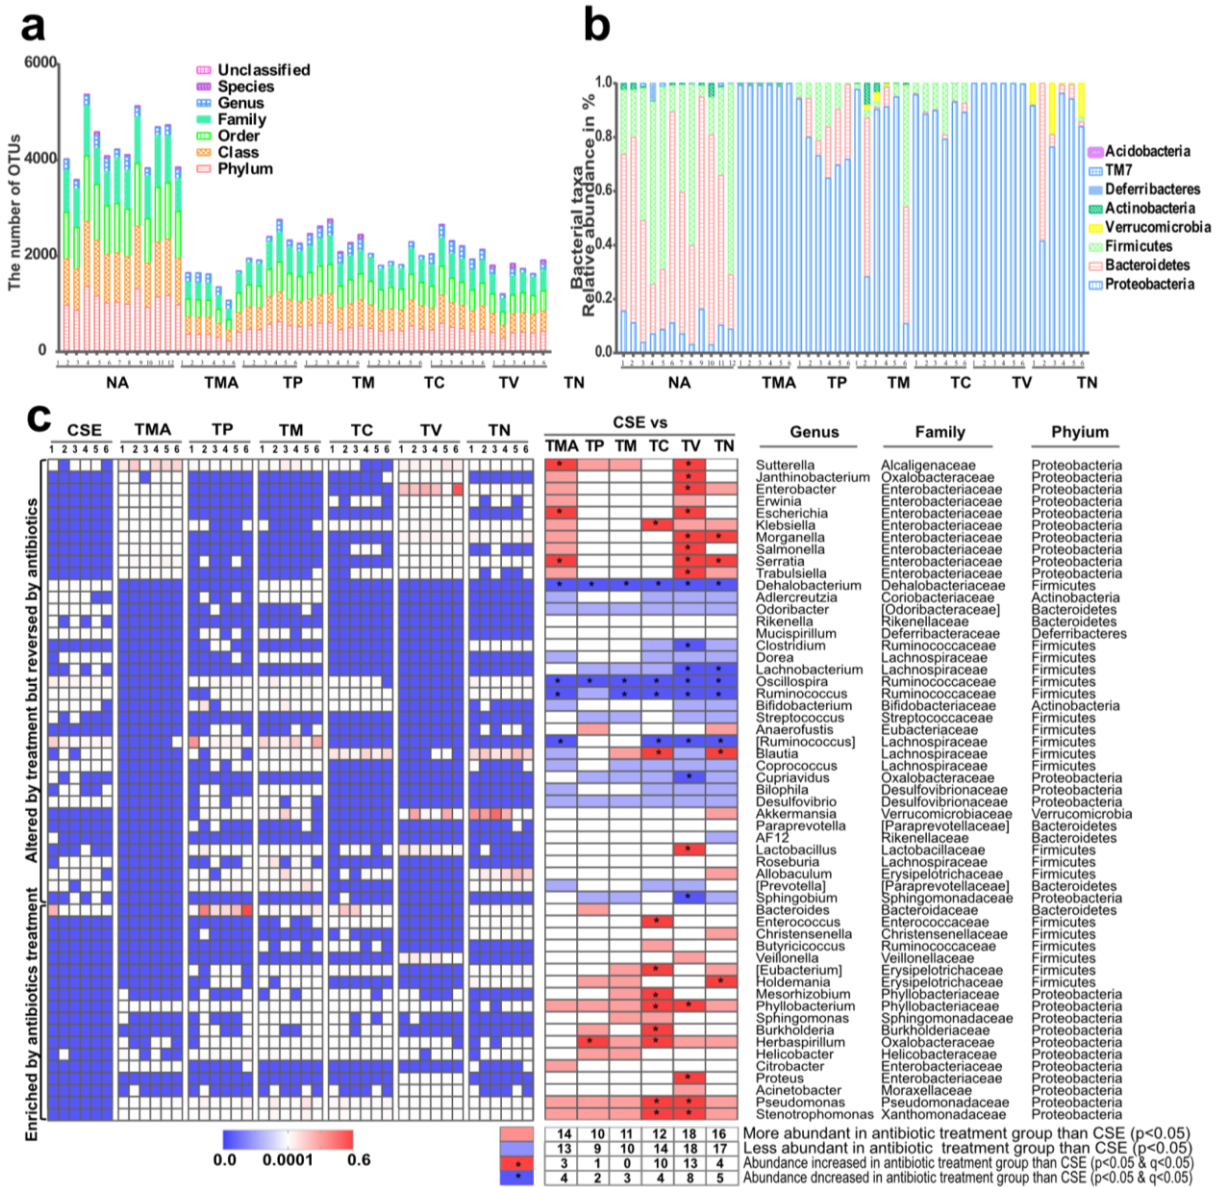

OTU classification and taxonomic status identification data of antibiotic treatment group before CSE administration (a). Taxonomic composition and abundance distribution of communities at the phylum level for each antibiotic treatment group before CSE administration  $n = 6$  mice/group (b). Genera changes by antibiotic treatment (c). Heatmaps on the left show that relative abundance of bacterial genera was altered. Statistical analysis of differences between groups was performed by Metastats; in the image, red represents increased relative abundance, blue represents decreased, and \* represents a significant change in genus (both  $P < 0.05$  and  $Q < 0.05$ ). The corresponding genus information is on the right.

Supplementary Fig. 4 Effects of CSE on Glycerolipid metabolism pathway.

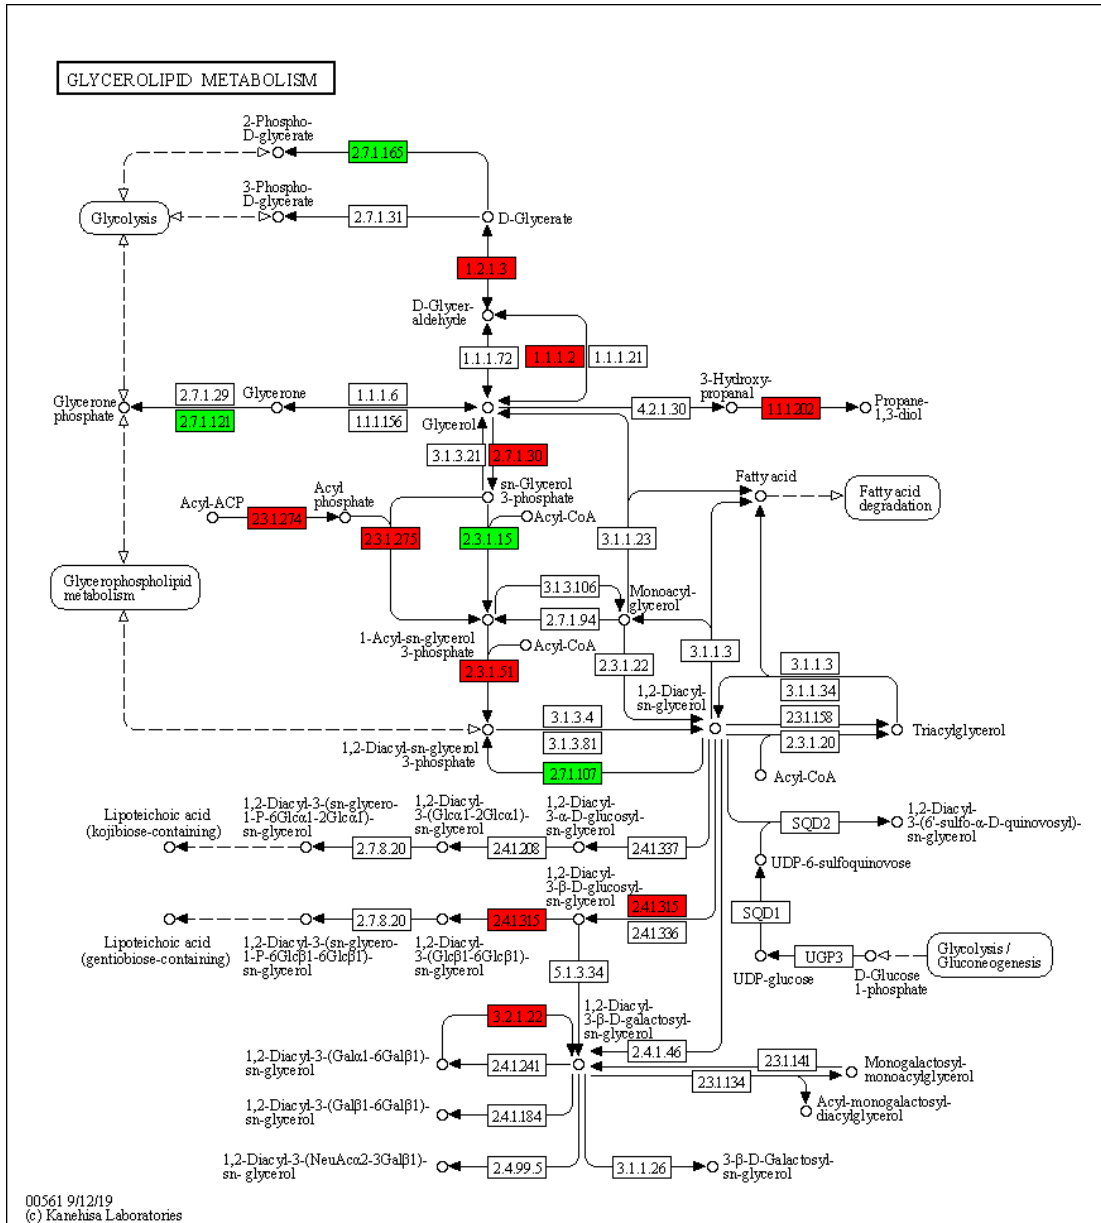

The genes marked in red means up-regulated by CSE treatment, green means down-regulated by CSE treatment, compare to HFD group.

**Supplementary Fig. 5 Effects of HFD on Lipopolysaccharide biosynthesis pathway.**

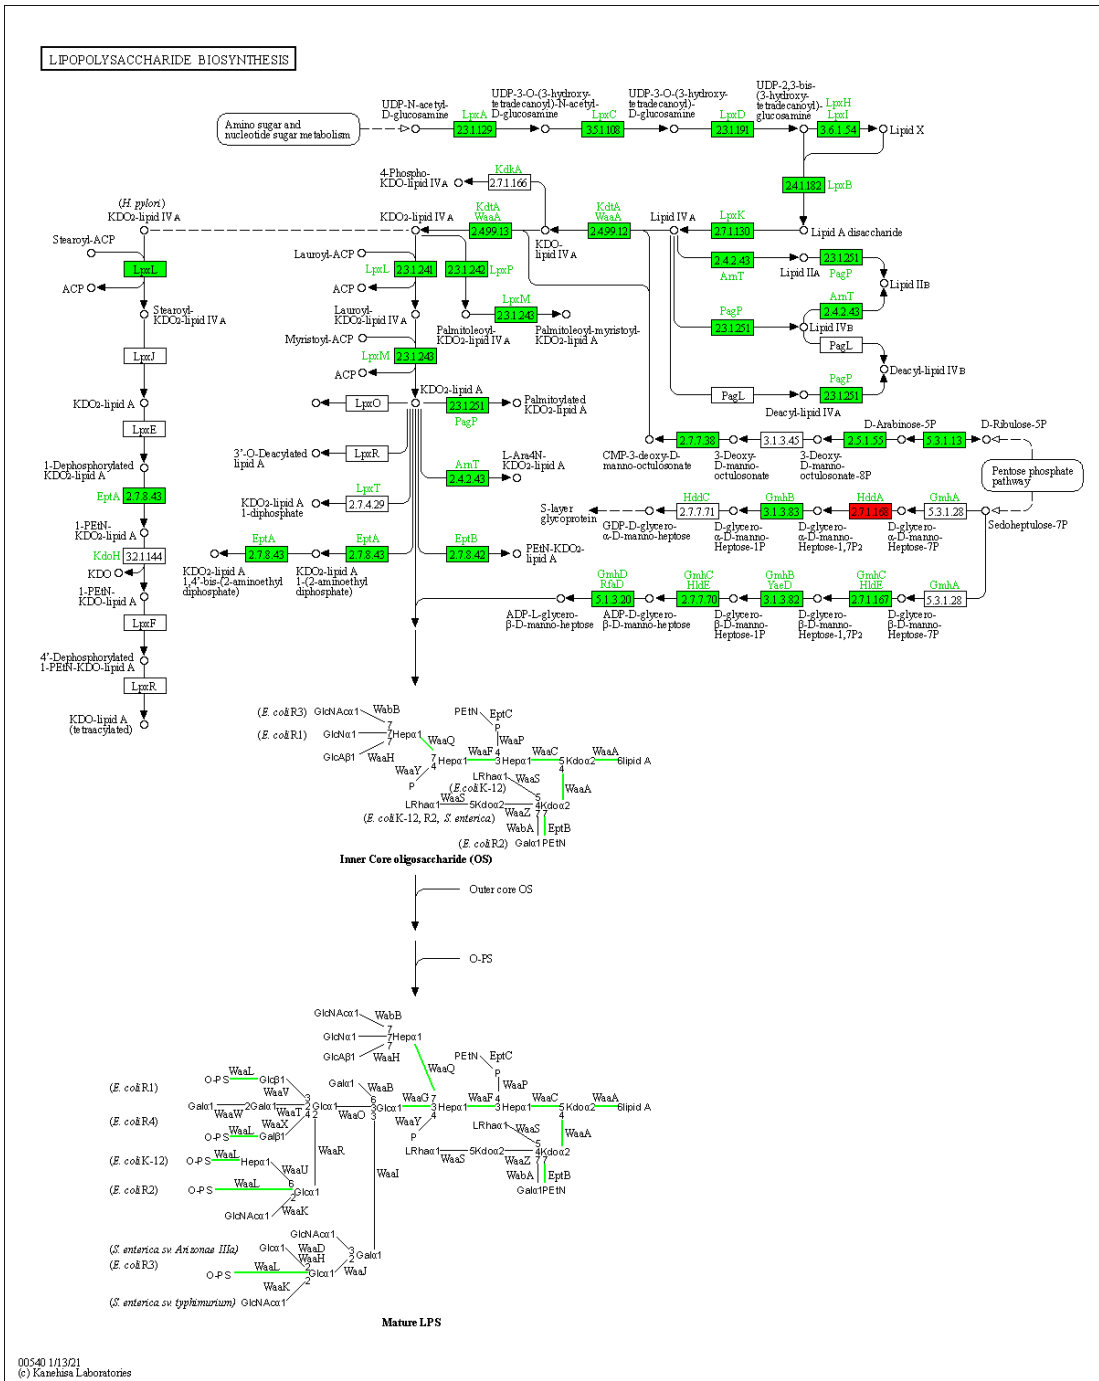

The genes marked in red means up-regulated by CSE treatment, green means down-regulated by CSE treatment, compare to HFD group.

**Supplementary table 1** The forward and reverse sequences in PCR

| Symbol         | primer forward        | primer reverse      |
|----------------|-----------------------|---------------------|
| $\beta$ -Actin | GCCCTGAGGCTCTCTTCCA   | GCGGATGTCGACGTCACA  |
| Occludin       | ATAATGGGAGTGAACCCGAC  | CTCCTGGGGATCAACCAC  |
| ZO-1           | AACGCTCTCATAAGCTTCGTA | CTCCCCTCAGAGACCCACA |
