# Supplementary material for: Hepatoprotective effects of Cassiae Semen on mice with non-alcoholic fatty liver disease based on gut microbiota
Source: PubMed Central journal article supplement (PMC8642482; doi:10.1038/s42003-021-02883-8), 2021-12-03
Supplement: 42003_2021_2883_MOESM3_ESM.pdf [file 42003_2021_2883_MOESM3_ESM.pdf]

## Description of Additional Supplementary Files

**File name:** Supplementary Data 1.

**Description:** The altered KOs by HFD or extracts/compounds administration.

**File name:** Supplementary Data 2.

**Description:** The altered functional metabolic pathways by HFD or extracts/compounds administration.

**File name:** Supplementary Data 3.

**Description:** CSE, TA, RG and AO ameliorated liver weight indices and fat accumulation, liver injury and inflammation, intestinal mucosal barrier injury and altered microbiota diversity in HFD-fed mice (Raw data).

**File name:** Supplementary Data 4.

**Description:** CS effects on fat accumulation, liver injury and inflammation, and intestinal mucosal barrier injury are transferred via FMT (Raw data).

**File name:** Supplementary Data 5.

**Description:** Extracts or compounds administration ameliorate antibiotic-induced dysbiosis in HFD-fed mice (Raw data).

**File name:** Supplementary Data 6.

**Description:** Genera changes by HFD and extracts or compounds administration (Raw data).

**File name:** Supplementary Data 7.

**Description:** KEGG pathway analysis (Raw data).
